# Supplementary material
Source: Research Square preprint supplement (doi:10.21203/rs.3.rs-9715965/v1)

Origin images of WB

Fig1H (The results of the triplicate experiment are as follows, the images in the red box are images of the body text, and the images in the blue boxes are duplicates)

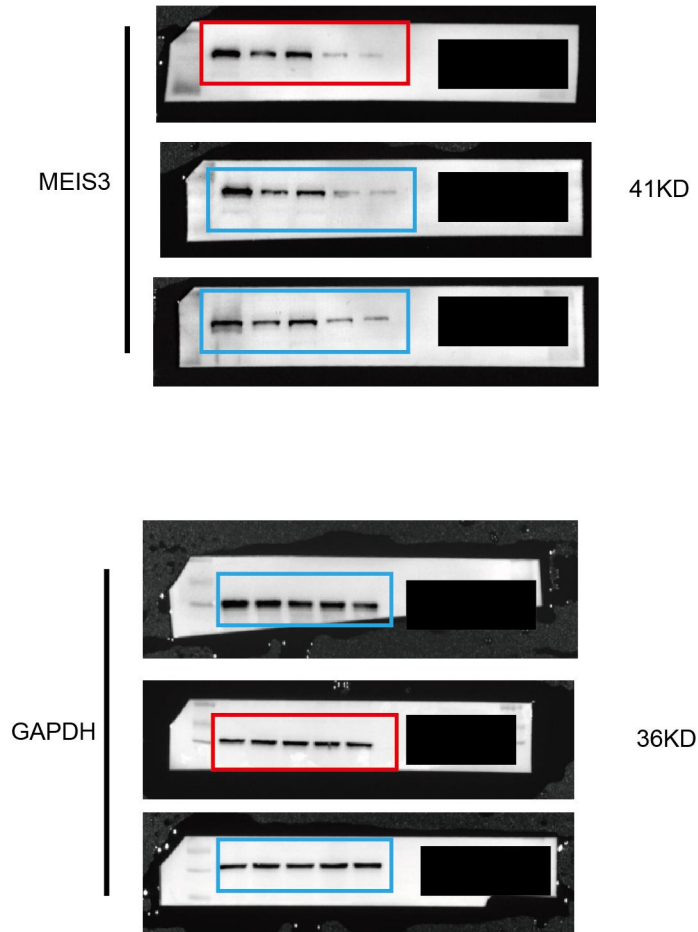

Fig3B (The results of the triplicate experiment are as follows, the images in the red box are images of the body text, and the images in the blue boxes are duplicates)

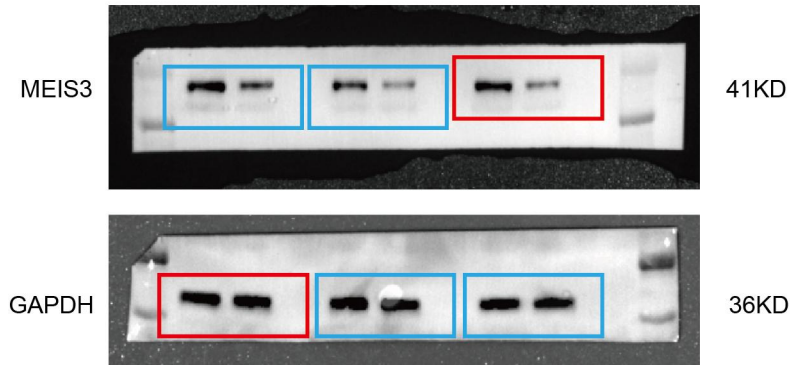

Fig3D (The results of the triplicate experiment are as follows, the images in the red box are images of the body text, and the images in the blue boxes are duplicates)

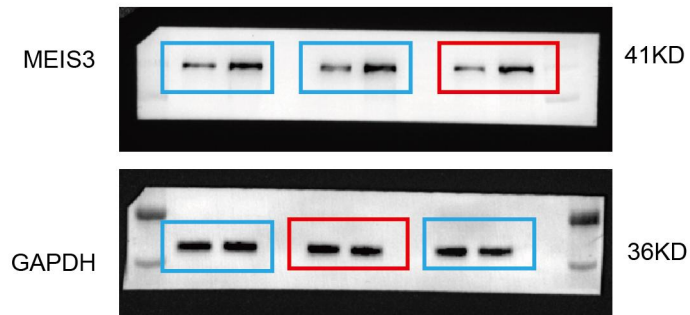

Fig4E (The results of the triplicate experiment are as follows, the images in the red box are images of the body text, and the images in the blue boxes are duplicates)

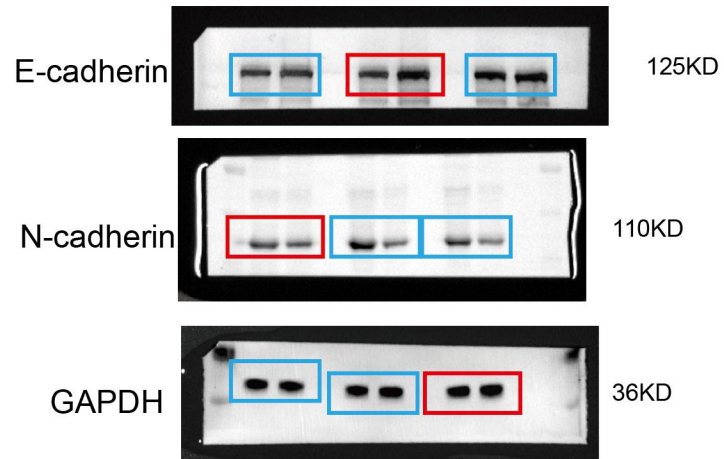

Fig4F (The results of the triplicate experiment are as follows, the images in the red box are images of the body text, and the images in the blue boxes are duplicates)

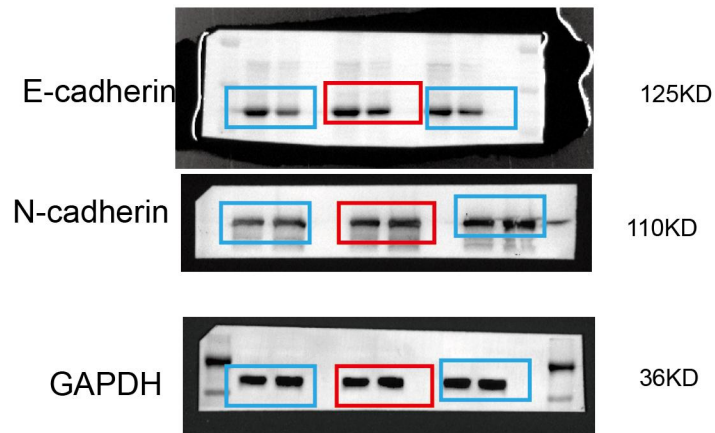

Fig5G (The results of the triplicate experiment are as follows, the images in the red box are images of the body text, and the images in the blue boxes are duplicates)

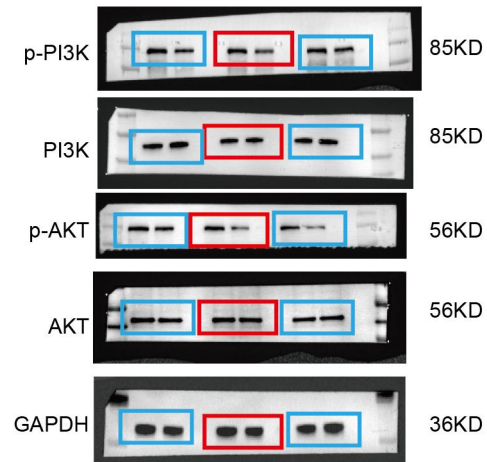

Fig5H (The results of the triplicate experiment are as follows, the images in the red box are images of the body text, and the images in the blue boxes are duplicates)

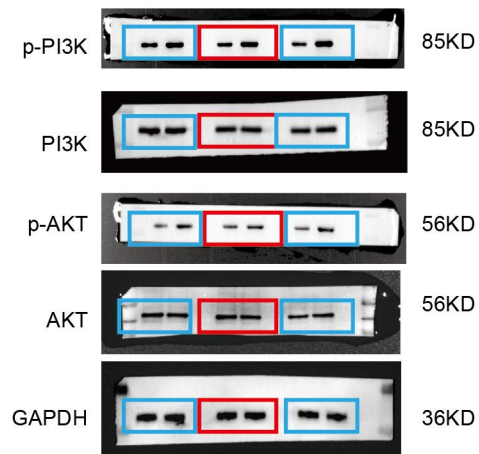

Supplement: Supplementary file 1 [file 31323485e7d3a1a076faec4a.pdf]
